# Supplementary material
Source: publisher figshare collection journal article supplement (https://karger.figshare.com/ndownloader/files/14413469)
Supplement: Supplementary file 1 [file 14413469]

**Supplemental Tables**

**Supplemental Table 1 (Table S1): Disease categories and target genes in the NGS panel.**

| **Disease** | **Target genes** |
| --- | --- |
| ADPKD | *PKD1, PKD2* |
| ARPKD | *PKHD1* |
| NPHP | *NPHP1, INVS, NPHP3, NPHP4, IQCB1, CEP290, GLIS2, RPGRIP1L, NEK8, SDCCAG8, TMEM67, TTC21B, WDR19, ZNF423, CEP164, ANKS6, IFT172, CEP83, DCDC2, XPNPEP3, SLC41A1* |
| JBS | *NPHP1, CEP290, RPGRIP1L, TMEM67, TTC21B, ZNF423, CEP164, IFT172, INPP5E, TMEM216, AHI1, ARL13B, CC2D2A, OFD1, KIF7, TCTN1, TMEM237, CEP41, TMEM138, C5orf42, TCTN3, TMEM231, CSPP1, PDE6D, MKS1, TCTN2, B9D1* |
| MKS | *NPHP3, CEP290, RPGRIP1L, TMEM67, TMEM216, CC2D2A, TMEM231, MKS1, TCTN2, B9D1, B9D2* |
| SLS | *NPHP1, INVS, NPHP3, NPHP4, IQCB1, CEP290, GLIS2, SDCCAG8, WDR19, CEP164* |
| BBS | *CEP290, SDCCAG8, TMEM67, TTC21B, WDR19, IFT172, MKS1, BBS1, BBS2, ARL6, BBS4, BBS5, MKKS, BBS7, TTC8, BBS9, BBS10, TRIM32, BBS12, WDPCP, BBIP1, IFT27, CCDC28B* |
| IFT | *TTC21B, WDR19, IFT172, WDR35, IFT122, IFT140, IFT43* |
| ADTKD | *MUC1, UMOD, HNF1B* |
| Other | *ASS1, NOTCH2* |

ADPKD, autosomal-dominant polycystic kidney disease; ADTKD, autosomal-dominant tubulointerstitial kidney disease; ARPKD, autosomal-recessive polycystic kidney disease; BBS, Bardet-Biedl syndrome; IFT, intraflagellar transport; JBS, Joubert syndrome; MKS, Meckel syndrome; NPHP, nephronophthisis; SLS, Senior-Løken syndrome.

**Supplemental Table 2 (Table S2): Coverage of the *PKD1* and *PKD2* genes.**

|  | **Average** | **95% confidence interval** | **Range** |
| --- | --- | --- | --- |
| *PKD1* (exons 2-46) |  |  |  |
| Mean depth | 714.0 | 518.4 to 909.6 | 341.8 to 1075.4 |
| Exon coverage (%) depth ≥5 | 100 | 100 | 100 |
| Exon coverage (%) depth ≥10 | 100 | 100 | 100 |
| Exon coverage (%) depth ≥20 | 100 | 100 | 100 |
|  |  |  |  |
| *PKD2* (all exons) |  |  |  |
| Mean depth | 431.3 | 298.5 to 564.2 | 159.0 to 645.8 |
| Exon coverage (%) depth ≥5 | 100 | 100 | 100 |
| Exon coverage (%) depth ≥10 | 100 | 100 | 100 |
| Exon coverage (%) depth ≥20 | 99.3 | 98.7 to 99.9 | 97.5 to 100 |

**Supplemental Table 3 (Table S3): Mutations in the *PKD1* truncating group.**

| Patient No. a | Mutation | Gene | Exon/  Intron | cDNA change b | Protein change | ADPKD Mutation Database | CADD | Polyphen | SIFT | ExAC | ToMMo | Previous  Reports |
| --- | --- | --- | --- | --- | --- | --- | --- | --- | --- | --- | --- | --- |
| T7 | frameshift | *PKD1* | 42 | c.11692_11693delTC | p.S3898fs | None | None | None | None | None | None | Novel |
| T19 | nonsense | *PKD1* | 43 | c.11816G>A | p.W3939* | None | 52.0 | None | None | None | None | Novel |
| T38 | frameshift | *PKD1* | 23 | c.8631delC | p.N2878fs | None | None | None | None | None | None | Novel |
| T39 | nonsense | *PKD1* | 6 | c.1287G>A | p.W429* | None | 27.7 | None | None | None | None | Novel |
| T55 | frameshift | *PKD1* | 42 | c.11569_11572dupTACA | p.S3858fs | None | None | None | None | None | None | Novel |
| T65 | frameshift | *PKD1* | 15 | c.6733_6740delATCCAGGC | p.I2245fs | None | None | None | None | None | None | Novel |
| T66 | nonsense | *PKD1* | 15 | c.6472C>T | p.Q2158* | Definitely Pathogenic | 37 | None | None | None | None | [1-3] |
| T70 | nonsense | *PKD1* | 8 | c.1687C>T | p.Q563* | Definitely Pathogenic | 36 | None | None | None | None | [4] |
| T74 | frameshift | *PKD1* | 15 | c.5316dupC | p.T1773fs | None | None | None | None | None | None | Novel |
| T100 | frameshift | *PKD1* | 8 | c.1669_1670delCT | p.L557fs | None | None | None | None | None | None | Novel |

CADD, combined annotation-dependent depletion; SIFT, sorting intolerant from tolerant; ExAC, exome aggregation consortium;

ToMMo, Tohoku Medical Megabank Organization

a The patient No. was assigned by Toranomon Hospital

b NCBI reference sequences: *PKD1*, NM_001009944.2

**Supplemental Table 4 (Table S4): Mutations in the *PKD1* non-truncating group.**

| Patient No. a | Mutation | Gene | Exon/  Intron | cDNA change b | Protein change | ADPKD  Mutation Database | CADD | Polyphen | SIFT | ExAC | ToMMo | Previous  reports |
| --- | --- | --- | --- | --- | --- | --- | --- | --- | --- | --- | --- | --- |
| T5 | missense | *PKD1* | 38 | c.11102T>G | p.L3701R | None | 15.35 | 1.0 | None | None | None | Novel |
| T23 | missense | *PKD1* | 19 | c.7546C>T | p.R2516C | High Likely Pathogenic | 29.2 | 0.995 | None | None | None | [5] |
| T24 | missense | *PKD1* | 27 | c.9505C>T | p.R3169W | None | 27.8 | 0.773 | None | 1.66E-05 | None | Novel |
| T35 | missense | *PKD1* | 7 | c.1522T>G | p.C508G | None | 17.49 | 0.998 | None | None | None | Novel |
| T37 | missense | *PKD1* | 33 | c.10309C>G | p.L3437V | None | 10.44 | 0.354 | None | None | None | Novel |
| T49 | missense | *PKD1* | 42 | c.11614G>C | p.E3872Q | High Likely Pathogenic | 21.6 | 1 | None | None | None | [5,6] |
| T54 | missense | *PKD1* | 28 | c.9586T>A | p.F3196I | None | 12.52 | 0.926 | None | None | None | Novel |
| T56 | missense | *PKD1* | 15 | c.5770G>A | p.G1924S | None | 0.01 | 0.037 | None | 0.00013 | 0.0005 | Novel |
| T59 | missense | *PKD1* | 15 | c.6796C>G | p.R2266G | None | 14.1 | 1 | None | None | None | Novel |
| T64 | missense | *PKD1* | 17 | c.7117T>C | p.C2373R | None | 19.08 | 0.0 | 0.0 | None | None | Novel |
| T69 | UTR | *PKD1* | 5’UTR | c.-70_-69dupGGGCCCC | － | None | None | None | None | None | None | Novel |
| T77 | missense | *PKD1* | 17 | c.7100C>T | p.S2367F | None | 17.32 | 0.006 | 0.03 | 0.00012 | None | [1] |
| T78 | missense | *PKD1* | 18 | c.7381G>C | p.A2461P | None | 26.2 | 0.996 | None | None | None | Novel |
| T84 | missense | *PKD1* | 15 | c.3416T>A | p.V1139E | None | 12.62 | 0.962 | None | None | None | Novel |
| T95 | missense | *PKD1* | 22 | c.8087T>G | p.L2696R | None | 0.35 | 0.0 | None | 0.00047 | None | Novel |
| T115 | missense | *PKD1* | 15 | c.6643C>T | p.R2215W | Likely Pathogenic | 22.4 | 0.717 | None | 8.367E-06 | None | [5,7] |
| T116 | missense | *PKD1* | 5 | c.542T>A | p.V181D | None | 6.35 | 0.811 | None | None | None | Novel |

CADD, combined annotation-dependent depletion; SIFT, sorting intolerant from tolerant; ExAC, exome aggregation consortium;

ToMMo, Tohoku Medical Megabank Organization

a The patient No. was assigned by Toranomon Hospital

b NCBI reference sequences: *PKD1*, NM_001009944.

**Supplemental Table 5 (Table S5): Mutations in the *PKD2* group.**

| Patient No. a | Mutation | Gene | Exon/  Intron | cDNA change b | Protein change | ADPKD  Mutation Database | CADD | Polyphen | SIFT | ExAC | ToMMo | Previous  reports |
| --- | --- | --- | --- | --- | --- | --- | --- | --- | --- | --- | --- | --- |
| T8 | missense | *PKD2* | 15 | c.2819G>A | p.R940H | None | 12.46 | 0.001 | 0.11 | None | 0.0022 | Novel |
| T26 | missense | *PKD2* | 14 | c.2668G>A | p.E890K | None | 27.0 | 0.781 | 0.07 | 4.94E-05 | 0.0049 | [8] |
| T30 | nonsense | *PKD2* | 5 | c.1249C>T | p.R417* | Definitely Pathogenic | 36.0 | None | None | None | None | [9] |
| T31 | nonsense | *PKD2* | 1 | c.239C>A | p.S80* | None | 28.1 | None | None | None | None | Novel |
| T68 | frameshift | *PKD2* | 13 | c.2384delC | p.S795fs | None | None | None | None | None | None | Novel |
| T82 | nonsense | *PKD2* | 4 | c.878G>A | p.W293* | None | 31.0 | None | None | None | None | Novel |
| T86 | frameshift | *PKD2* | 11 | c.2159dupA | p.N720fs | Definitely Pathogenic | 12.62 | 0.962 | None | None | None | [10] |
| T92 | frameshift | *PKD2* | 1 | c.420delG | p.G143fs | None | None | None | None | None | None | Novel |
| T94 | frameshift | *PKD2* | 11 | c.2159dupA | p.N720fs | Definitely Pathogenic | None | None | None | None | None | [10] |

CADD, combined annotation-dependent depletion; SIFT, sorting intolerant from tolerant; ExAC, exome aggregation consortium;

ToMMo, Tohoku Medical Megabank Organization

a The patient No. was assigned by Toranomon Hospital

b NCBI reference sequences: *PKD2*, NM_000279.3

**Supplemental Table 6 (Table S6): Pathogenic mutations in the Other group.**

| Patient No. a | Mutation | Gene | cDNA change b | Protein change | CADD | Polyphen | SIFT | ExAC | ToMMo | Previous  Reports |
| --- | --- | --- | --- | --- | --- | --- | --- | --- | --- | --- |
| T1 | missense  missense | *NPHP4*  *NPHP4* | c.2198G>A  c.2717G>A | p.G733D  p.R906H | 20.1  5.89 | 1  0.003 | 0  0.21 | 9.10E-05  0.00022 | 0.0037  0.0061 | Novel  Novel |
| T2 | missense  missense | *PKHD1*  *PKHD1* | c.1396G>A  c.1160A>T | p.G466R  p.N387I | 20.1  23.4 | 0.999  1 | 0.01  0 | None  None | None  None | [11]  Novel |
| T16 | frameshift | *OFD1* | c.505_506delAG | p.D170fs | 24.0 | None | None | None | None | Novel |

CADD, combined annotation-dependent depletion; SIFT, sorting intolerant from tolerant; ExAC, exome aggregation consortium;

ToMMo, Tohoku Medical Megabank Organization

a The patient No. was assigned by Toranomon Hospital

b NCBI reference sequences: *NPHP4*, NM_015102.4; *PKHD1*, NM_138694.3; *OFD1*, NM_003611.2

**Supplementary Tables References**

1　Jin M, Xie Y, Chen Z, Liao Y, Li Z, Hu P, Qi Y, Yin Z, Li Q, Fu P, Chen X: System analysis of gene mutations and clinical phenotype in Chinese patients with autosomal-dominant polycystic kidney disease. Scientific reports 2016;6:35945.

2　Rossetti S, Chauveau D, Walker D, Saggar-Malik A, Winearls CG, Torres VE, Harris PC: A complete mutation screen of the ADPKD genes by DHPLC. Kidney international 2002;61:1588-1599.

3　Xiong HY, Alipanahi B, Lee LJ, Bretschneider H, Merico D, Yuen RK, Hua Y, Gueroussov S, Najafabadi HS, Hughes TR, Morris Q, Barash Y, Krainer AR, Jojic N, Scherer SW, Blencowe BJ, Frey BJ: RNA splicing. The human splicing code reveals new insights into the genetic determinants of disease. Science (New York, NY) 2015;347:1254806.

4　McCluskey M, Schiavello T, Hunter M, Hantke J, Angelicheva D, Bogdanova N, Markoff A, Thomas M, Dworniczak B, Horst J, Kalaydjieva L: Mutation detection in the duplicated region of the polycystic kidney disease 1 (PKD1) gene in PKD1-linked Australian families. Human mutation 2002;19:240-250.

5　Cornec-Le Gall E, Audrezet MP, Chen JM, Hourmant M, Morin MP, Perrichot R, Charasse C, Whebe B, Renaudineau E, Jousset P, Guillodo MP, Grall-Jezequel A, Saliou P, Ferec C, Le Meur Y: Type of PKD1 mutation influences renal outcome in ADPKD. Journal of the American Society of Nephrology : JASN 2013;24:1006-1013.

6　Audrezet MP, Cornec-Le Gall E, Chen JM, Redon S, Quere I, Creff J, Benech C, Maestri S, Le Meur Y, Ferec C: Autosomal dominant polycystic kidney disease: comprehensive mutation analysis of PKD1 and PKD2 in 700 unrelated patients. Human mutation 2012;33:1239-1250.

7　Neumann HP, Jilg C, Bacher J, Nabulsi Z, Malinoc A, Hummel B, Hoffmann MM, Ortiz-Bruechle N, Glasker S, Pisarski P, Neeff H, Kramer-Guth A, Cybulla M, Hornberger M, Wilpert J, Funk L, Baumert J, Paatz D, Baumann D, Lahl M, Felten H, Hausberg M, Zerres K, Eng C: Epidemiology of autosomal-dominant polycystic kidney disease: an in-depth clinical study for south-western Germany. Nephrol Dial Transplant 2013;28:1472-1487.

8　Kurashige M, Hanaoka K, Imamura M, Udagawa T, Kawaguchi Y, Hasegawa T, Hosoya T, Yokoo T, Maeda S: A comprehensive search for mutations in the PKD1 and PKD2 in Japanese subjects with autosomal dominant polycystic kidney disease. Clinical genetics 2015;87:266-272.

9　Pei Y, He N, Wang K, Kasenda M, Paterson AD, Chan G, Liang Y, Roscoe J, Brissenden J, Hefferton D, Parfrey P, Somlo S, St George-Hyslop P: A spectrum of mutations in the polycystic kidney disease-2 (PKD2) gene from eight Canadian kindreds. Journal of the American Society of Nephrology : JASN 1998;9:1853-1860.

10　Pei Y, Wang K, Kasenda M, Paterson AD, Liang Y, Huang E, Lian J, Rogovea E, Somlo S, St George-Hyslop P: A novel frameshift mutation induced by an adenosine insertion in the polycystic kidney disease 2 (PKD2) gene. Kidney international 1998;53:1127-1132.

11　Denamur E, Delezoide AL, Alberti C, Bourillon A, Gubler MC, Bouvier R, Pascaud O, Elion J, Grandchamp B, Michel-Calemard L, Missy P, Zaccaria I, Le Nagard H, Gerard B, Loirat C, Barbet J, Beaufrere AM, Berchel C, Bessieres B, Boudjemaa S, Buenerd A, Carles D, Clemenson A, Dechelotte P, Devisme L, Dijoud F, Esperandieu O, Fallet C, Gonzales M, Hillion Y, Jacob B, Joubert M, Kermanach P, Lallemand A, Laquerriere A, Laurent N, Liprandi A, Loeuillet L, Loget P, Martinovic J, Menez F, Narcy F, Roux JJ, Rouleau-Dubois C, Sinico M, Tantau J, Wann AR: Genotype-phenotype correlations in fetuses and neonates with autosomal recessive polycystic kidney disease. Kidney international 2010;77:350-358.
